# Supplementary material for: Association of cerebral microvascular perfusion and diffusion dynamics detected by intravoxel incoherent motion-diffusion weighted imaging with initial neurological function and clinical outcome in acute ischemic stroke
Source: PeerJ. 2021 Sep 16;9:e12196. doi: 10.7717/peerj.12196 (PMC8450009; doi:10.7717/peerj.12196)
Supplement: Supplemental Information 5 [file peerj-09-12196-s005.xls]

## Sheet: Sheet1
No.	F=0/M=1	Age	L/R	Time of onset to scan (hour)	MRA(1<50% 2>50% 3=100%)	NIHSS-admission	smoking	alcohol	HBP	DM	Hyperlipidemia	Dominant hemisphere	atrial fibrillation	mRS-90day	infarction volume(ml)	OB1	OB2	ADC_lesion(10-4)	OB1	OB2	ADC_contra(10-4)	OB1	OB2	D_lesion(10-4)	OB1	OB2	D_contra(10-4)	OB1	OB2	D*_lesion(10-3)	OB1	OB2	D*_contra(10-3)	OB1	OB2	f_lesion(%)	OB1	OB2	f_contra(%)	OB1	OB2
PT001	1	69	L	25	2	8	1	1	1	0	1	1	0	2	7.54	7.11	7.97	4.17	3.87	4.47	10.3	9.98	10.62	3.67	3.25	4.09	7.53	6.58	8.48							4.65	4.98	4.32	4.37	5.02	3.72
PT002	0	75	R	33	1	5	0	0	1	0	1	0	0	1	4.888	4.52	5.256	3.42	3.31	3.53	6.54	6.68	6.4	2.83	2.58	3.08	5.11	5.23	4.99							5.52	5.04	6	7.88	8.28	7.48
PT003	0	60	R	19	1	4	1	1	0	0	0	0	1	0	1.417	1.62	1.214	3.26	3.64	2.88	6.22	5.98	6.46	2.59	2.97	2.21	5.07	5.54	4.6	16.3	14.21	18.39	14	10.58	17.42	3.63	4.25	3.01	6.96	7.64	6.28
PT004	1	75	R	15	1	10	0	0	1	1	1	0	0	2	11.57	12.25	10.89	3.58	3.25	3.91	6.87	6.54	7.2	3.03	3.25	2.81	5.65	5.25	6.05							4.56	4.26	4.86	6	6.84	5.16
PT005	0	72	L	48	1	3	0	0	0	0	0	1	0	2	2.496	2.88	2.112	2.43	2.65	2.21	9.38	9.21	9.55	1.47	1.56	1.38	6.4	6.69	6.11	19.6	16.58	22.62	29.5	25.11	33.89	1.51	2.22	0.8	3.35	2.97	3.73
PT006	1	72	L	48	1	4	0	0	0	0	0	1	0	1	2.522	2.31	2.734	2.26	2.17	2.35	5.86	5.55	6.17	2.18	2.35	2.01	4.79	5.32	4.26	14.1	17.32	10.88	33.6	28.33	38.87	3.4	4.02	2.78	7.59	8.24	6.94
PT007	1	52	R	48	1	2	0	0	0	0	0	0	0	0	0.572	0.57	0.574	3.44	3.38	3.5	5.19	4.99	5.39	3.25	3.69	2.81	3.97	3.39	4.55	9.57	13.25	5.89	16.3	21.32	11.28	2.82	3.11	2.53	5.63	4.57	6.69
PT008	1	78	R	43	2	14	1	1	0	0	0	0	0	4	20.5075	22.21	18.805	3.85	3.41	4.29	10.8	9.87	11.73	3.17	2.98	3.36	8.03	8.41	7.65							2.37	2.18	2.56	5.39	6.05	4.73
PT009	1	65	L	38	2	8	1	0	1	0	0	1	0	2	8.71	8.14	9.28	3.95	3.57	4.33	6.93	6.25	7.61	3.11	3.04	3.18	5.43	6.21	4.65	23	19.65	26.35	20.3	23.25	17.35	4.74	5.04	4.44	5.69	6.69	4.69
PT010	0	79	L	14	3	13	1	0	1	1	1	1	1	4	47.1965	44.21	50.183	2.19	1.98	2.4	6.31	6.66	5.96	1.88	1.87	1.89	4.96	4.58	5.34							1.43	1.44	1.42	4.67	4.01	5.33
PT011	1	37	R	23	1	6	0	0	0	0	0	0	0	2	5.5055	4.98	6.031	2.74	2.55	2.93	5.91	5.54	6.28	2.37	2.45	2.29	4.76	4.21	5.31							0.839	0.89	0.788	4.8	4.57	5.03
PT012	1	72	L	6	3	18	0	0	1	0	1	1	1	4	268.398	256.32	280.476	3.76	3.98	3.54	6.93	6.85	7.01	3.06	3.35	2.77	5.33	5.03	5.63							4.31	4.55	4.07	4.54	5.52	3.56
PT013	0	84	R	14	3	12	0	1	1	0	0	0	0	3	31.1025	29.33	32.875	3.37	4.25	2.49	6.91	6.32	7.5	2.87	2.65	3.09	5.71	5.65	5.77							4.46	4.56	4.36	6.68	6.21	7.15
PT014	0	53	R	48	2	4	0	1	0	0	0	0	0	0	1.534	1.89	1.178	3.79	3.22	4.36	5.41	5.21	5.61	3.11	3.54	2.68	4.23	4.25	4.21	5.85	5.65	6.05	14.1	16.55	11.65	8.94	6.99	10.89	6.23	6.65	5.81
PT015	0	89	R	48	2	11	0	0	1	1	0	0	0	1	19.1165	24.38	13.853	4.87	4.21	5.53	8.14	8.65	7.63	3.72	3.28	4.16	5.75	5.55	5.95							4.49	4.21	4.77	4.79	4.52	5.06
PT016	0	81	R	38	2	13	1	1	1	1	0	0	0	3	33.969	29.65	38.288	4.91	4.44	5.38	11.3	10.11	12.49	4.18	4.21	4.15	7.12	7.24	7							4.93	4.59	5.27	5.11	4.87	5.35
PT017	1	86	L	38	1	3	1	0	0	0	0	1	0	1	2.86	3.36	2.36	3.18	3.88	2.48	8.48	7.99	8.97	2.63	2.68	2.58	6.4	6.21	6.59							5.02	4.37	5.67	6.13	5.69	6.57
PT018	1	78	R	14	1	13	0	0	0	0	1	0	0	3	41.457	38.69	44.224	2.49	2.22	2.76	6.7	6.32	7.08	1.94	1.84	2.04	5.27	5.07	5.47	6.63	8.24	5.02	19	23.21	14.79	5.61	6.25	4.97	5.99	5.63	6.35
PT019	0	70	L	10	2	17	0	0	1	1	1	1	0	5	152.523	145.78	159.265	2.28	2.17	2.39	7.21	6.58	7.84	1.93	1.68	2.18	6.02	5.88	6.16							7.3	6.47	8.13	6.92	6.45	7.39
PT020	0	69	R	35	1	4	0	1	1	0	0	0	0	2	3.224	2.98	3.468	3.1	2.88	3.32	6.44	5.98	6.9	2.34	2.35	2.33	4.14	3.98	4.3	12.6	16.55	8.65	16.4	14.89	17.91	4.28	4.67	3.89	6.56	6.87	6.25
PT021	0	76	L	48	1	5	0	0	0	0	0	1	1	3	9.451	11.64	7.262	3.09	2.68	3.5	6.37	5.65	7.09	2.4	2.82	1.98	5.05	4.89	5.21	17.6	15.47	19.73	19	16.96	21.04	3.36	3.64	3.08	5.91	6.21	5.61
PT022	0	79	R	15	1	5	1	0	0	0	0	0	0	2	4.446	4.25	4.642	2.62	3.1	2.14	7.47	8.65	6.29	1.83	1.77	1.89	5	4.69	5.31							3.07	3.55	2.59	4.06	4.52	3.6
PT023	1	70	L	23	2	2	0	1	0	0	0	1	0	1	2.951	2.58	3.322	5.37	5.14	5.6	12.5	10.54	14.46	4.31	4.65	3.97	8.27	7.98	8.56							3.88	4.25	3.51	5.06	4.97	5.15
PT024	1	80	L	19	1	6	0	0	1	0	0	1	1	2	13.767	11.98	15.554	3.91	3.54	4.28	7.34	6.25	8.43	3.85	3.28	4.42	5.84	5.25	6.43							4.3	3.29	5.31	4.63	5.1	4.16
PT025	1	73	R	36	1	3	0	0	0	0	0	0	0	0	1.391	1.14	1.642	5.29	4.89	5.69	6.98	6.14	7.82	3.9	4.21	3.59	5.24	4.68	5.8	19.3	15.69	22.91	20	24.32	15.68	5.42	5.66	5.18	5.63	5.26	6
PT026	0	61	R	42	2	5	1	0	1	0	0	0	0	3	7.956	7.21	8.702	4.05	4.65	3.45	8.34	7.02	9.66	3.71	3.65	3.77	6.8	6.28	7.32							6.48	6.21	6.75	5.14	5.55	4.73
PT027	1	77	R	27	2	14	1	1	1	1	1	0	0	2	28.223	24.87	31.576	3.25	3.14	3.36	6.21	5.23	7.19	2.6	2.35	2.85	4.79	4.66	4.92							5.08	4.78	5.38	6.93	7.68	6.18
PT028	0	80	L	39	3	23	1	1	1	0	0	1	1	5	371.592	359.89	383.294	2.09	2.01	2.17	9	7.89	10.11	1.73	2.24	1.22	6.38	5.69	7.07	6.56	5.24	7.88	20.3	25.17	15.43	6.57	6.14	7	7.48	8.65	6.31
PT029	0	81	L	31	3	21	0	0	1	1	1	1	0	4	337.948	352.14	323.756	2.69	2.64	2.74	7.16	7.56	6.76	2.23	2.58	1.88	5.62	6.87	4.37							5.28	4.89	5.67	6.18	7.24	5.12
PT030	1	30	R	27	3	4	0	0	1	0	0	0	0	3	4.6345	4.48	4.789	2.45	2.25	2.65	6.2	6.21	6.19	1.95	1.78	2.12	4.77	5.64	3.9	5.82	7.32	4.32	20.1	16.54	23.66	4.4	4.11	4.69	4.61	5.29	3.93
PT031	0	65	R	31	3	4	0	0	1	0	0	0	0	0	4.1925	4.54	3.845	4.76	4.52	5	6.76	6.15	7.37	4.24	4.05	4.43	5.46	5.24	5.68							5.56	5.12	6	6.04	6.56	5.52
PT032	0	78	L	28	3	19	1	0	1	0	1	1	1	4	299.955	317.32	282.591	3.5	3.24	3.76	7.58	6.87	8.29	3.45	3.21	3.69	6.27	6.65	5.89							0.696	0.71	0.682	2.39	3.14	1.64
PT033	1	61	L	17	1	3	0	0	0	0	0	1	0	0	2.041	2.66	1.422	4.91	4.19	5.63	6.45	5.94	6.96	4	3.88	4.12	5.25	6.14	4.36							6.23	7.02	5.44	6.75	6.25	7.25
PT034	0	65	L	35	1	7	0	1	0	1	0	1	0	3	15.925	18.14	13.71	2.34	2.25	2.43	6.49	6.87	6.11	1.54	1.38	1.7	5.14	5.65	4.63	14.8	12.22	17.38	32.9	30.27	35.53	3.76	4.55	2.97	4.4	4.89	3.91
PT035	1	60	L	21	1	1	0	0	0	0	0	1	0	0	0.8645	0.78	0.949	4.25	4.12	4.38	6.16	5.28	7.04	3.36	3.67	3.05	4.76	4.21	5.31	14.4	17.34	11.46	15.8	16.58	15.02	5.51	6.14	4.88	6.19	5.69	6.69
PT036	1	61	L	27	1	2	0	0	1	1	1	1	1	2	1.521	1.55	1.492	2.91	3.65	2.17	5.91	6.65	5.17	2.37	2.98	1.76	4.73	4.96	4.5	10.4	9.25	11.55	13.3	12.22	14.38	5.28	5.56	5	6.3	6.66	5.94
PT037	0	69	L	11	3	6	1	1	1	0	0	1	0	3	17.3745	18.32	16.429	2.94	2.87	3.01	6.54	7.21	5.87	2.16	2.29	2.03	5.85	5.27	6.43	12	9.99	14.01	36.3	33.53	39.07	5.64	5.41	5.87	4.68	4.58	4.78
PT038	1	52	L	41	3	15	0	0	1	1	1	1	0	4	73.9505	68.91	78.991	1.89	1.59	2.19	6.84	7.74	5.94							40.6	46.38	34.82	34.6	32.48	36.72	3.63	3.57	3.69	6.95	6.25	7.65
PT039	0	56	R	30	1	5	0	0	1	0	0	0	0	0	4.004	3.81	4.198	3.92	4.26	3.58	5.73	6.75	4.71	2.99	2.39	3.59	4.76	5.15	4.37							3.57	4.21	2.93	7.87	7.99	7.75

## Sheet: Sheet2
						Good	Poor		Good	Poor		Good	Poor		Good	Poor		Good	Poor
					Paremeter	Radc			rD			Rd*			rf			rfD*
					Mean	0.538932	0.398633		0.575121	0.429534		0.780999	0.548829		0.759568	0.794296		0.582488	0.401333
					SD	0.138294	0.084911		0.143792	0.10271		0.266173	0.353114		0.261333	0.297273		0.265536	0.126308
					Paremeter	Radc	rD	Rd*	rf	rfD*
				Good	Mean	0.538932	0.575121	0.780999	0.759568	0.582488
				Poor		0.398633	0.429534	0.548829	0.794296	0.401333
				Good	SD	0.138294	0.143792	0.266173	0.261333	0.265536
				Poor		0.084911	0.10271	0.353114	0.297273	0.126308
